# Supplementary material
Source: MDPI journal article supplement (https://www.mdpi.com/2313-0105/9/6/296)
Supplement: s1 [file s1]

## **Supporting information**

### **Fe<sub>3</sub>C Decorated Folic Acid-Derived Graphene-Like Carbon Modified Separator as Polysulfide Barrier for High-Performance Lithium-Sulfur Battery**

Zenghui Lin<sup>†</sup>, Junan Feng<sup>†</sup>, Wendong Liu, Lu Yin, Wanyang Chen, Chuan Shi,  
Jianjun Song\*

College of Physics, Qingdao University, Qingdao 266071, Shandong, China.

\*Correspondence: [jianjun.song@qdu.edu.cn](mailto:jianjun.song@qdu.edu.cn)

<sup>†</sup> These authors contributed equally to this work.

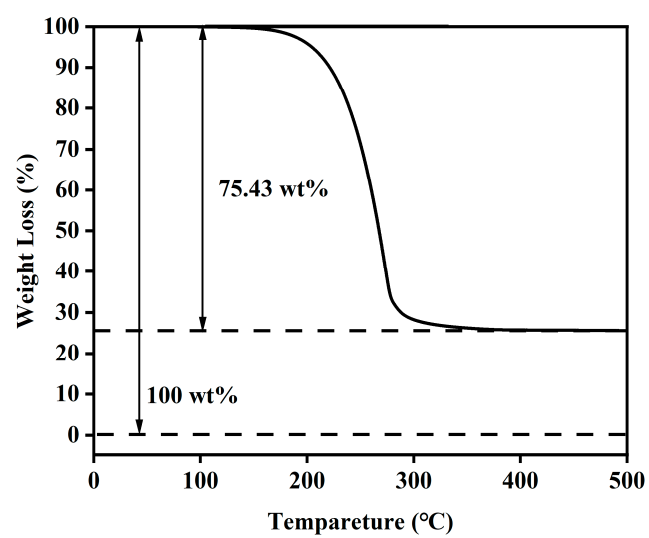

**Figure S1.** TGA curve of KB/S composites

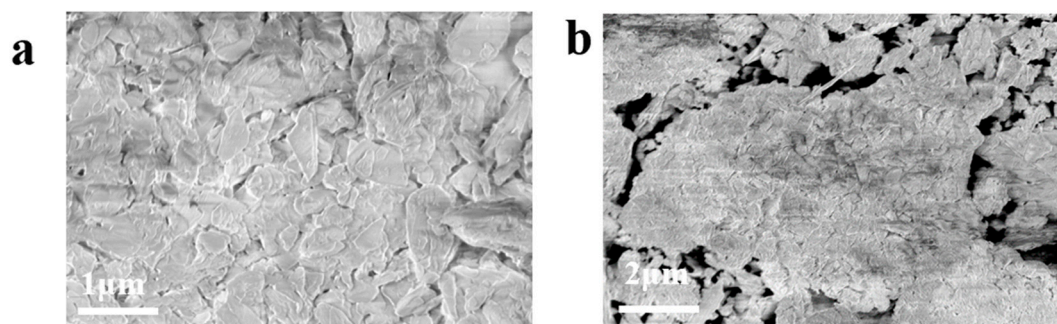

**Figure S2.** SEM images of raw folic acid without heat treatment

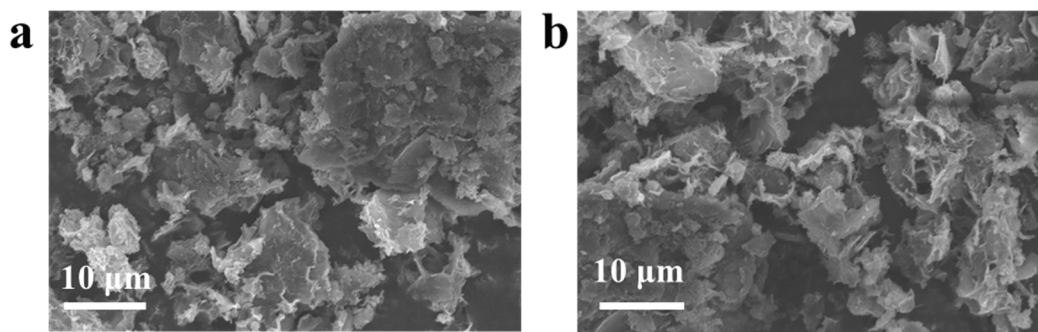

**Figure S3.** SEM images of N-CS

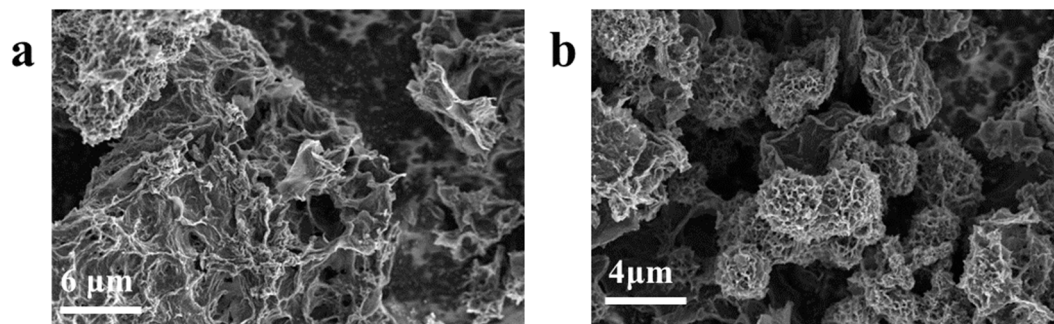

**Figure S4.** SEM images of Fe<sub>3</sub>C@N-CS

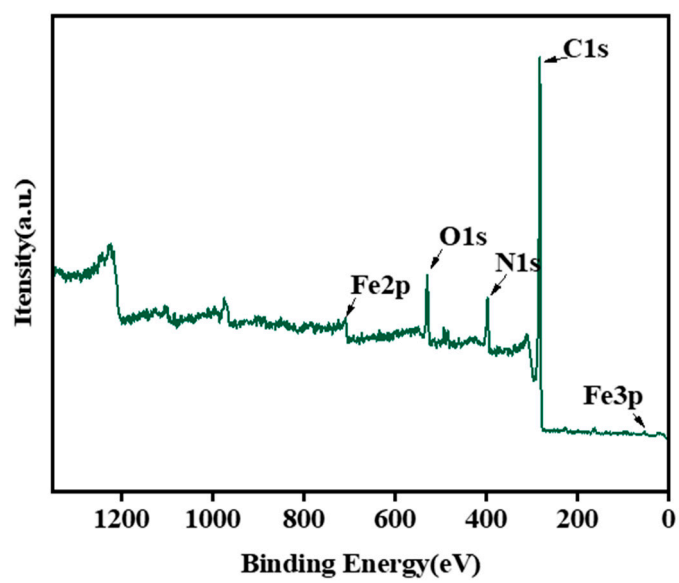

**Figure S5.** XPS spectrum of Fe<sub>3</sub>C@N-CS

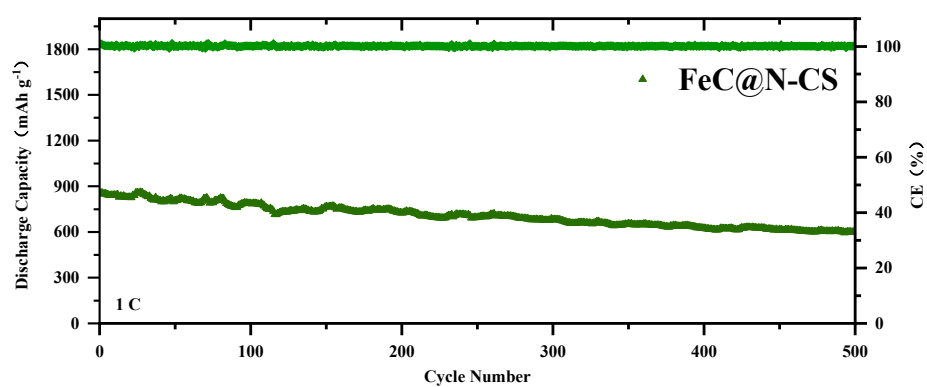

**Figure S6.** Long cycle performance of Li-S battery with  $\text{Fe}_3\text{C}@\text{N-CS}$  modified separator at 1 C

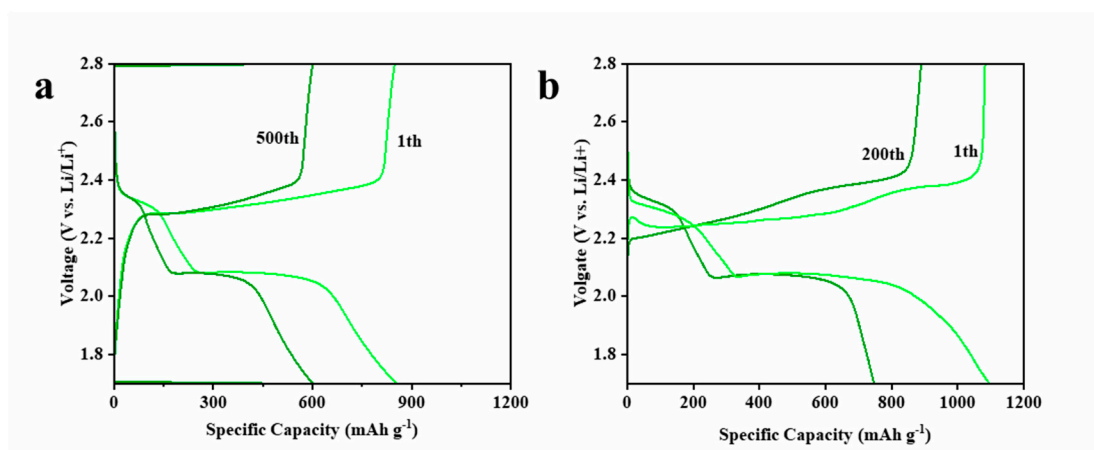

**Figure S7.** Galvanostatic charge/discharge profiles of Li-S battery with Fe<sub>3</sub>C@N-CS modified separator at 1 C (a) and Li-S batteries with Fe<sub>3</sub>C@N-CS modified separator under high S loading of 4 mg cm<sup>-2</sup> at 0.2 C (b)

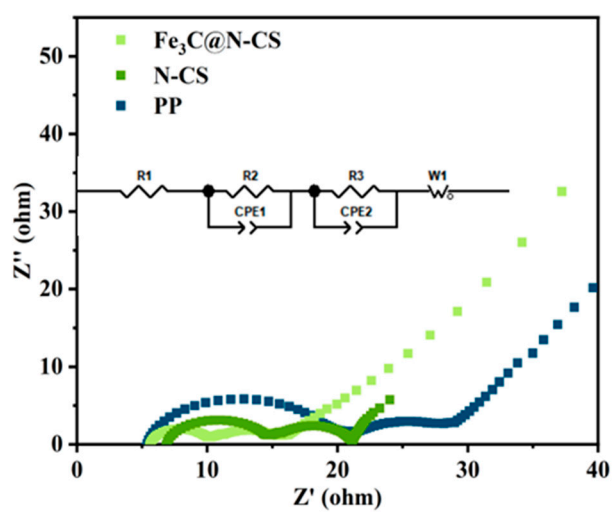

**Figure S8.** The EIS spectra of the cells with different separators after 50 cycles at 1 C

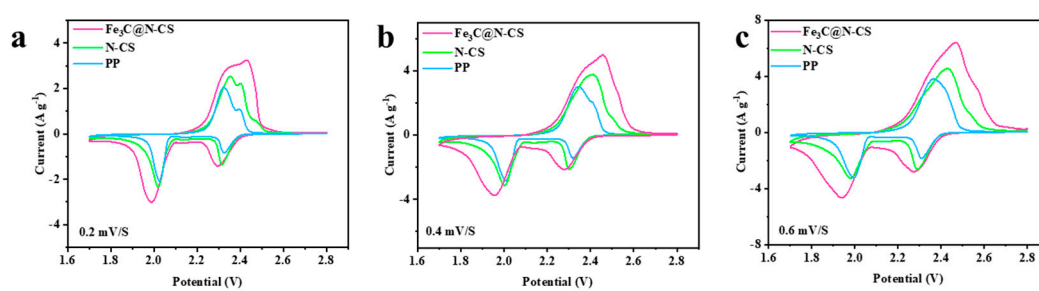

**Figure S9.** CV curves of Li-S battery with Fe<sub>3</sub>C@N-CS, N-CS, and PP separators at 0.2 mV s<sup>-1</sup> (a), 0.4 mV s<sup>-1</sup> (b), and 0.6 mV s<sup>-1</sup> (c)

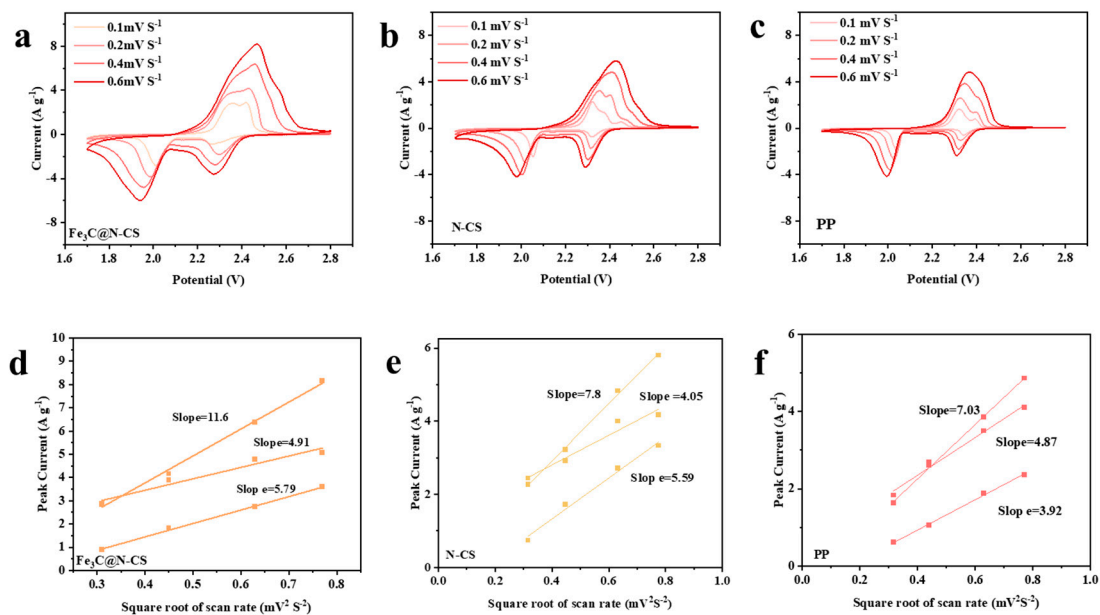

**Figure S10.** CV curves of cells with Fe<sub>3</sub>C@N-CS (a), N-CS (b), PP (c) separators at 0.1-0.6 mV s<sup>-1</sup>, and Slope images of fitting linear curves of the peak currents versus square roots of scan rate (d, e, f).

**Table 1.** The table of the performance comparison between this work and relevant research.

| Material                                     | Sulfur loading<br>[mg cm <sup>-2</sup> ] | Capacity at<br>the low rate | Capacity at<br>the high rate | Cycles (rate)/<br>Decay rate<br>[%] | Ref.             |
|----------------------------------------------|------------------------------------------|-----------------------------|------------------------------|-------------------------------------|------------------|
| <b>Fe<sub>3</sub>C@N-CS</b>                  | 1.278                                    | 1260 (0.2 C)                | 890 (1 C)                    | 500 (1 C)/0.06                      | <b>This work</b> |
| <b>Fe<sub>3</sub>C-N-rGO</b>                 | 0.7-1                                    | 1075 (0.1 C)                | 580.5 (4 C)                  | 100 (1 C)/0.068                     | [S1]             |
| <b>Fe<sub>3</sub>S<sub>4</sub>/rGO</b>       | 1                                        | 1293 (0.2 C)                | 684 (1 C)                    | 300 (1 C)/0.052                     | [S2]             |
| <b>Fe<sub>2</sub>O<sub>3</sub>/Fe-SA@NC</b>  | 1.2                                      | 1192 (0.2 C)                | ...                          | 800 (1 C)/0.025                     | [S3]             |
| <b>Fe<sub>3</sub>C/CNF</b>                   | 2.3~2.8                                  | 1177 (200 mA/g)             | ...                          | 100 (x200 mA/g)/0.24                | [S4]             |
| <b>Fe<sub>3</sub>C/Fe@NC/G</b>               | 1.5                                      | 1200 (0.2 C)                | 850 (1 C)                    | 500 (1 C)/0.062                     | [S5]             |
| <b>Fe<sub>3</sub>C-CNF</b>                   | ~ 2.0                                    | 1087 (0.2 C)                | 1040 (1 C)                   | 250 (1 C)/0.091                     | [S6]             |
| <b>Fe<sub>3</sub>C-FeN@NCF</b>               | ... (71.8 wt%)                           | 1028 (0.5 C)                | ...                          | 400 (0.5 C)/0.1                     | [S7]             |
| <b>KB&amp;Fe<sub>3</sub>O<sub>4</sub>-GF</b> | 0.7                                      | 1004.9 (0.5 C)              | 869.3 (1 C)                  | 80 (1 C)/0.075                      | [S8]             |

- S1 H. Pan; Z. Tan; H. Zhou; L. Jiang; Z. Huang; Q. Feng; Q. Zhou; S. Ma; Y. Kuang. Fe<sub>3</sub>C-N-doped carbon modified separator for high performance lithium-sulfur batteries. *Journal of Energy Chemistry* **2019** 39 101-108.
- S2 L. Li; H. Liu; B. Jin; Q. Sheng; Q. Li; M. Cui; Y. Li; X. Lang; Q. Jiang. Functional Separator Modified with Reduced Graphene Oxide and Fe<sub>3</sub>S<sub>4</sub> for High-Performance Lithium–Sulfur Batteries. *ACS Applied Nano Materials* **2023** 6 1161-1170.
- S3 S. Zhang; Y. Zhang; L. Ma; C. Ma; C. Zhang; Y. Chen; L. Chen; L. Zhou; W. Wei. Dual Active Sites of Oversaturated Fe-N(<sub>5</sub>) and Fe(<sub>2</sub>) O(<sub>3</sub>) Nanoparticles for Accelerating Redox Kinetics of Polysulfides. *Small* **2023** e2300293.
- S4 J.-Q. Huang; B. Zhang; Z.-L. Xu; S. Abouali; M. Akbari Garakani; J. Huang; J.-K. Kim. Novel interlayer made from Fe<sub>3</sub>C/carbon nanofiber webs for high performance lithium–sulfur batteries. *Journal of Power Sources* **2015** 285 43-50.
- S5 S. Wang; X. Liu; H. Duan; Y. Deng; G. Chen. Fe<sub>3</sub>C/Fe nanoparticles embedded in N-doped porous carbon nanosheets and graphene: A thin functional interlayer for PP separator to boost performance of Li-S batteries. *Chemical Engineering Journal* **2021** 415 129001.
- S6 K. Wu; Y. Hu; Z. Cheng; P. Pan; M. Zhang; L. Jiang; J. Mao; C. Ni; Y. Zhang; Z. Wang; X. Gu; X. Zhang. Fe<sub>3</sub>C composite carbon nanofiber interlayer for efficient trapping and conversion of polysulfides in lithium-sulfur batteries. *Journal of Alloys and Compounds* **2020** 847 156447.
- S7 M. Zhang; J. Mu; Y. Li; Y. Pan; Z. Dong; B. Chen; S. Guo; W. Yuan; H. Fang; H. Hu; M. Wu. Propelling polysulfide redox by Fe<sub>3</sub>C-FeN heterostructure@nitrogen-doped carbon framework towards high-efficiency Li-S batteries. *Journal of Energy Chemistry* **2023** 78 105-114.
- S8 R. Zhu; S. Lin; J. Jiao; D. Ma; Z. Cai; K. Hany; T.M. Hamouda; Y. Cai. Magnetic and mesoporous Fe<sub>3</sub>O<sub>4</sub>-modified glass fiber separator for high-performance lithium-sulfur battery. *Ionics* **2019** 26 2325-2334.
